# Supplementary material for: MiR-218-5p/EGFR Signaling in Arsenic-Induced Carcinogenesis
Source: MDPI journal article supplement (doi:10.3390/cancers15041204), 2023-02-14
Supplement: s1 [file s1]

**Figure S5. The original western blots of Figure 1.**

Figure 1A The Expression of EGFR and  $\beta$ -actin band in B2B and As-T cells using an immunoblotting assay

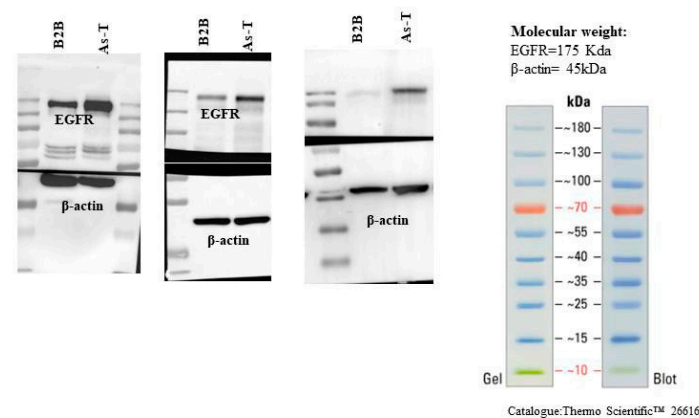

Figure 1A Quantification: The intensity of EGFR/ $\beta$ -actin band in B2B and As-T cells using an immunoblotting assay

| No | B2B | As-T     |
|----|-----|----------|
| 1  | 1   | 1.71978  |
| 2  | 1   | 1.415135 |
| 3  | 1   | 1.65353  |

Figure 1B. The expression levels of phospho-PKM2, PKM2, p-p65, p-65, HIF-1 $\alpha$ , p-ERK (1/2) and  $\beta$ -actin in total protein extracts of control and As-T cells

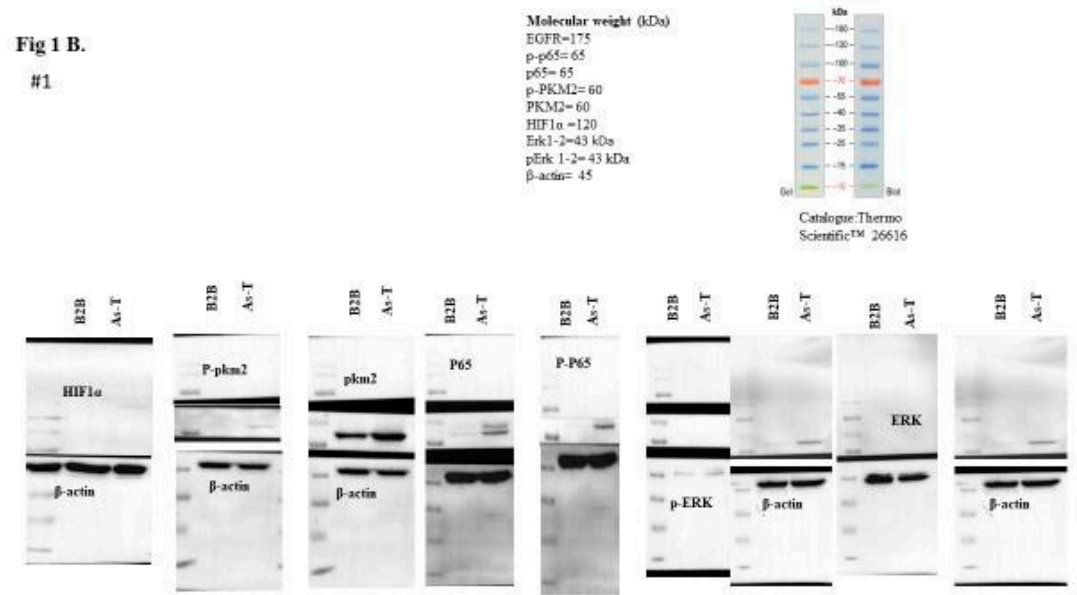

Fig 1 B.

#2-3

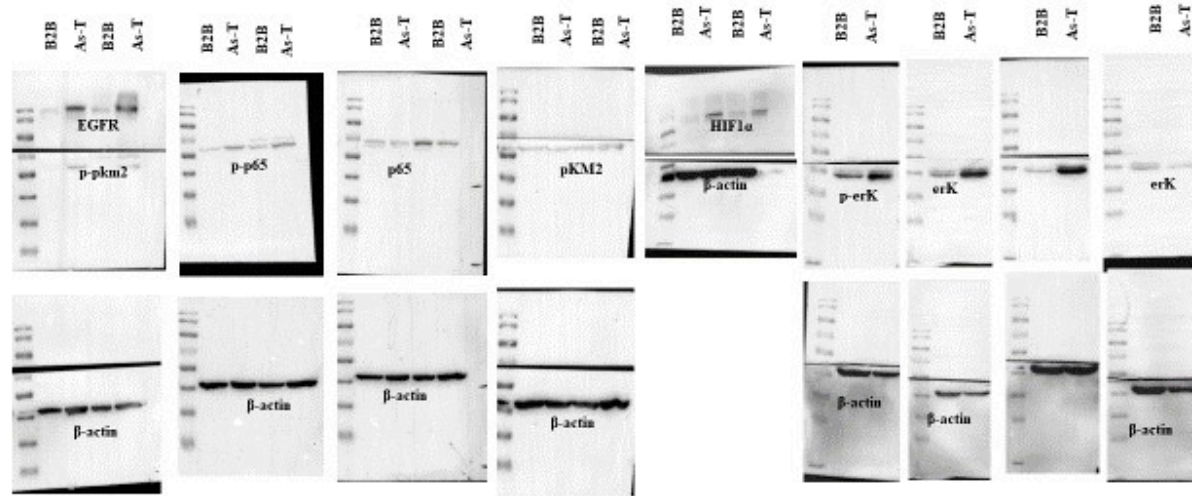

Figure 1B Quantification: The intensity of protein band/ $\beta$ -actin band in B2B and As-T cells using an immunoblotting assay

|        |     | Fold Change |             |             |
|--------|-----|-------------|-------------|-------------|
|        |     | #1          | #2          | #3          |
| HIF1-a | B2B | 0           | 1.038350114 | 1.003963517 |
|        | AsT | 7.513476675 | 7.205567449 | 3.35526823  |
| p-PKM2 | B2B | 0           | 1.03902834  | 1.016150564 |
|        | AsT | 10.81973799 | 6.812428251 | 5.067618473 |

|       |     |             |             |             |
|-------|-----|-------------|-------------|-------------|
| PKM2  | B2B | 1           | 1.013868787 | 1.005457659 |
|       | AsT | 1.68360821  | 1.172101493 | 1.709965375 |
| p-P65 | B2B | 1           | 1           | 1.011226315 |
|       | AsT | 3.841935084 | 3.441654966 | 2.190570706 |
| p65   | B2B | 1           | 1.01871613  | 1           |
|       | AsT | 14.62522025 | 0.851738119 | 0.44564078  |
| p-ERK | B2B | 1           | 1.003603744 | 1.011132791 |
|       | AsT | 4.593193286 | 8.462779656 | 10.06550657 |
| ERK   | B2B | 1           | 1.00055142  | 1.009407112 |
|       | AsT | 0.757908751 | 5.387219528 | 0.262748519 |

Figure 1C. The expression levels of phospho-PKM2, PKM2, p-p65, p-65, HIF-1 $\alpha$ , and  $\beta$ -actin in total protein extracts in the As-T cells transfected with siRNA against EGFR or scrambled control (siSCR)

Fig 1 C.

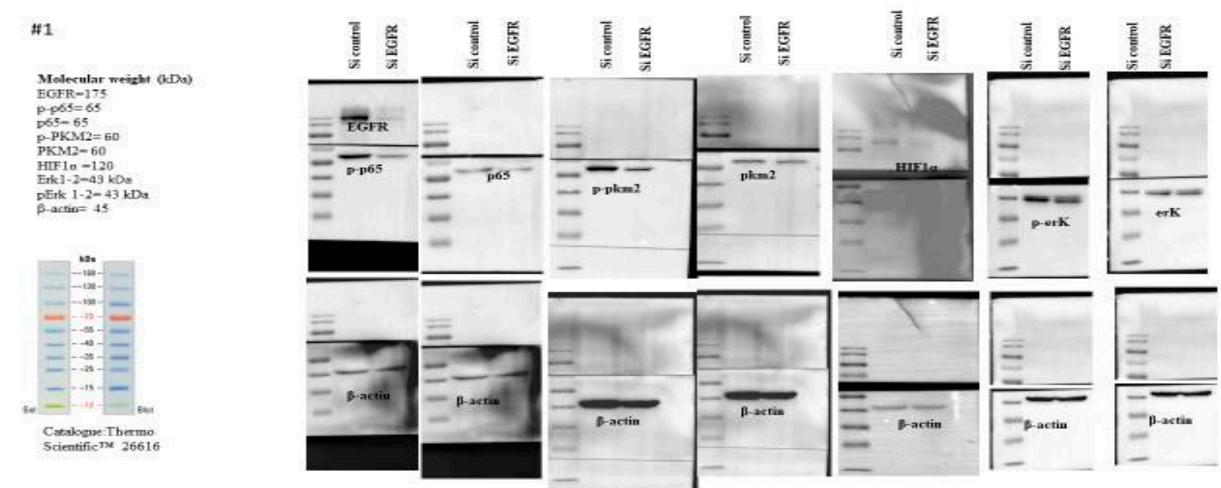

Fig 1 C.

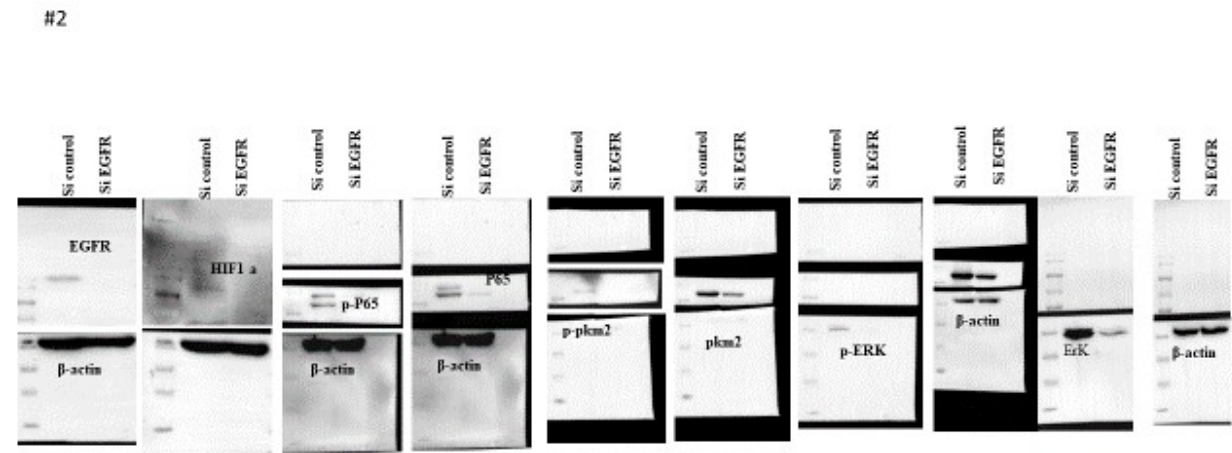

Fig 1 C.

#3

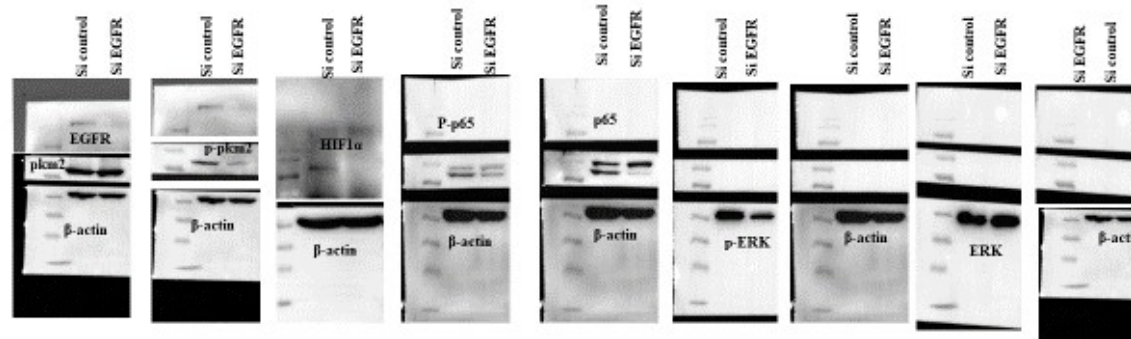

Figure 1C Quantification: The intensity of protein band/ $\beta$ -actin band in Si-SCR and Si-EGFR cells using an immunoblotting assay

|        |         | Fold Change |             |          |
|--------|---------|-------------|-------------|----------|
|        |         | #1          | #2          | #        |
| EGFR   | Si-SCR  | 1           | 1.001863026 | 1.007315 |
|        | Si-EGFR | 0.079959    | 0           | 0.768502 |
| HIF1-a | Si-SCR  | 1.006041    | 1.004669016 | 1.00551  |
|        | Si-EGFR | 0.325758    | 0           | 0.28911  |
| p-PKM2 | Si-SCR  | 1.008048    | 1.002692505 | 1.00254  |
|        | Si-EGFR | 0.565169    | 0           | 0.643737 |
| PKM2   | Si-SCR  | 1.00636     | 1.000443398 | 1.006012 |
|        | Si-EGFR | 1.245826    | 0.34280569  | 1.524688 |
| p-P65  | Si-SCR  | 0.999127    | 1.003827943 | 1.007185 |
|        | Si-EGFR | 0.112555    | 0.175697657 | 0.700818 |
| p65    | Si-SCR  | 1.000451    | 1.009529456 | 1.001061 |
|        | Si-EGFR | 0.600757    | 0.193288903 | 0.786167 |
| p-ERK  | Si-SCR  | 1.00003     | 1.004118301 | 1.000603 |
|        | Si-EGFR | 0.659367    | 0.180814844 | 0.674251 |
| ERK    | Si-SCR  | 1.008662    | 1.001599053 | 1.005293 |
|        | Si-EGFR | 0.803249    | 0.153028261 | 1.0109   |

Figure 1D Quantification: Expression of miR-218-5p/U6 in B2B and As-T cells using TaqMan real-time RT-PCR assay

| No | B2B         | As-T        |
|----|-------------|-------------|
| 1  | 1.011184355 | 0.001658592 |
| 2  | 1.045012323 | 0.001824573 |
| 3  | 0.977954818 | 0.001716582 |
| 4  | 0.967674856 | 0.002017178 |

|    |             |             |
|----|-------------|-------------|
| 5  | 0.855389236 | 0.003303905 |
| 6  | 1.093999778 | 0.003251155 |
| 7  | 1.036316411 | 0.003777692 |
| 8  | 1.03116131  | 0.003782759 |
| 9  | 0.870057644 | 0.005887638 |
| 10 | 0.945756312 | 0.00692946  |
| 11 | 1.037629442 | 0.00700525  |
| 12 | 1.171198314 | 0.006959501 |

**Figure S6. The original western blots of Figure 2.**

Figure 2A. Expression of miR-218-5p/U6 in As-T was confirmed by TaqMan real-time RT-PCR

| No. | miR-NC    | miR-218-5p  |
|-----|-----------|-------------|
| 1   | 1.0039648 | 27.93909769 |
| 2   | 1.0014514 | 24.1584295  |
| 3   | 1.0424178 | 26.02776697 |
| 4   | 0.954135  | 21.50351084 |
| 5   | 0.985496  | 262.8416648 |
| 6   | 1.0439328 | 252.5643798 |
| 7   | 0.9922668 | 256.3014832 |
| 8   | 0.9795895 | 264.5058568 |

Figure 2A. Cell proliferation assay was performed by count number of alive cells using cell counter under microscope

| Days | control |       |       |       | miR-218-5p |       |       |       |
|------|---------|-------|-------|-------|------------|-------|-------|-------|
| 0    | 10000   | 10000 | 10000 | 10000 | 10000      | 10000 | 10000 | 10000 |
| 1    | 13000   | 16000 | 13200 | 15000 | 11000      | 13000 | 10800 | 15000 |
| 2    | 18000   | 21000 | 15600 | 22500 | 19000      | 15000 | 18000 | 22000 |



|   |       |       |       |       |       |       |       |       |
|---|-------|-------|-------|-------|-------|-------|-------|-------|
| 3 | 36000 | 42000 | 45000 | 38000 | 26000 | 24000 | 36000 | 26000 |
| 4 | 55000 | 56000 | 59000 | 49000 | 36000 | 39000 | 44600 | 33300 |
| 5 | 89000 | 86000 | 95000 | 87000 | 56000 | 65000 | 70000 | 62000 |

Figure 2B. Colony formation assay using soft agar

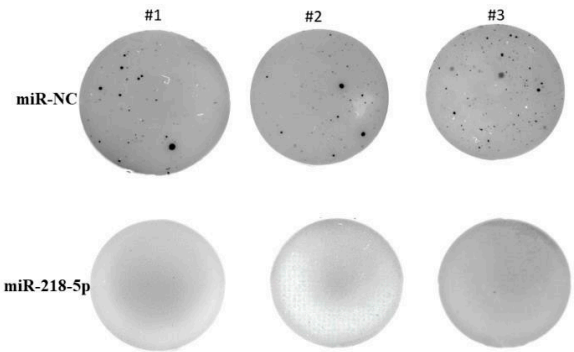

Figure 2B. Quantification: Number of colonies

| No. | miR-NC | miR-218-5p |
|-----|--------|------------|
| 1   | 44     | 15         |
| 2   | 58     | 8          |
| 3   | 67     | 5          |

Figure 2C. Wound healing assay

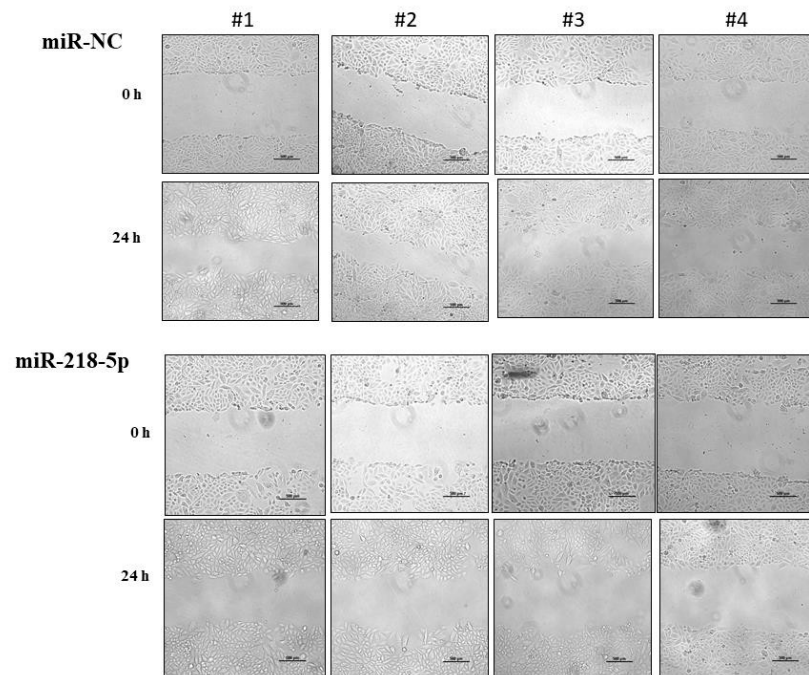

Figure 2C. Quantification: Percentage of wound healing

| No | miR-NC | miR-218-5P |
|----|--------|------------|
| 1  | 23.1   | 1.84       |
| 2  | 40.94  | 8.42       |
| 3  | 38.94  | 17.98      |
| 4  | 31     | 15.64      |

Figure 2D. Cell migration assay

**miR-NC**

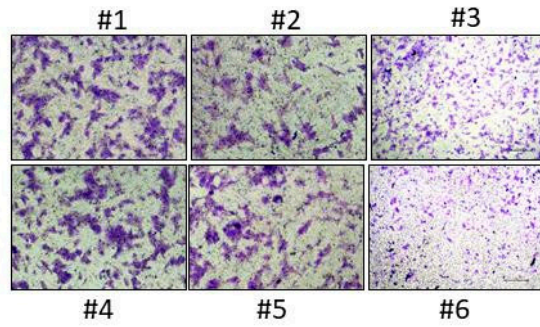

**miR-218-5p**

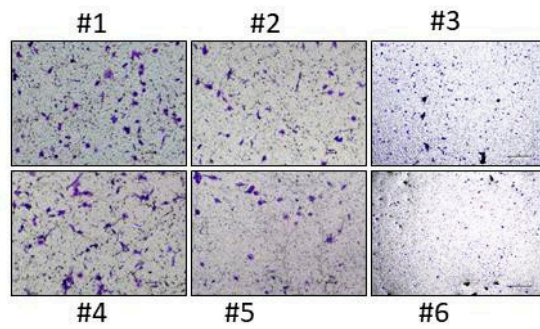

Figure 2D. Quantification: Percentage of cells migrates compare to control

| No | miR-NC   | miR-218-5p |
|----|----------|------------|
| 1  | 116.1593 | 30.445     |
| 2  | 115.2225 | 28.5714    |
| 3  | 57.1429  | 20.6089    |
| 4  | 79.6253  | 16.39344   |
| 5  | 139.11   | 17.3302    |
| 6  | 92.7401  | 14.5199    |

Figure 2E. Tube formation assay

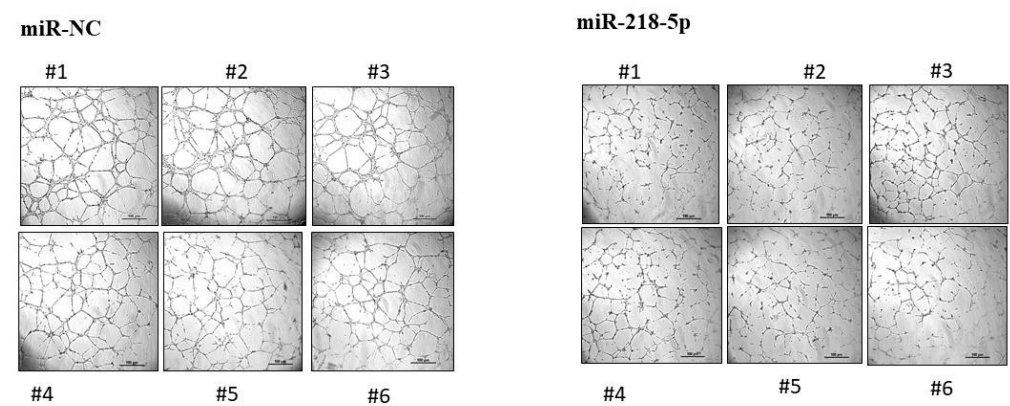

Figure 2E. Quantification: No of meshes

| No | miR-NC | miR-218-5p |
|----|--------|------------|
| 1  | 41     | 19         |
| 2  | 35     | 9          |
| 3  | 33     | 13         |
| 4  | 23     | 7          |
| 5  | 21     | 8          |
| 6  | 34     | 30         |

Figure 2E. Quantification: Total tube length

| No | miR-NC | miR-218-5p |
|----|--------|------------|
| 1  | 102.3  | 75.82      |
| 2  | 107.3  | 51.63      |
| 3  | 112.2  | 66.35      |
| 4  | 88.6   | 51.95      |

|   |       |       |
|---|-------|-------|
| 5 | 85.90 | 56.36 |
| 6 | 103.4 | 90.19 |

**Figure S7. The original western blots of Figure 3.**

Figure 3C. Luciferase assay was performed using HEK-293 T cells to detect the relative luciferase activities of WT and MUT EGFR reporters with or without miR-218-5p overexpression. Renilla luciferase vector was used as an internal control. The result is the ratio of Firefly and Renilla signals

| <b>Figure 3C</b>   |  | <b>Luciferase ctivity</b> |         |         |         |         |         |            |         |         |         |         |         |
|--------------------|--|---------------------------|---------|---------|---------|---------|---------|------------|---------|---------|---------|---------|---------|
| Plasmids           |  | miR-NC                    |         |         |         |         |         | miR-218-5p |         |         |         |         |         |
| EGFR-WT            |  | 0.959612                  | 1.00808 | 1.00162 | 1.06641 | 0.92578 | 1.00781 | 0.63791    | 0.76484 | 0.75299 | 0.59766 | 0.64453 | 0.60938 |
| 3' UTR-mutant EGFR |  | 0.952073                  | 1.01454 | 0.88315 | 0.79688 | 1.03125 | 0.90234 | 0.93807    | 0.965   | 0.84437 | 0.78516 | 0.64453 | 0.69141 |

Figure 3D. As-T cells, Cr-T cells, A431 cells were transfected with miR-NC and miR-218-5p mimic. After 72 h, the protein levels of EGFR and  $\beta$ -actin were analyzed using immunoblotting assay.

**Fig 3 D.**

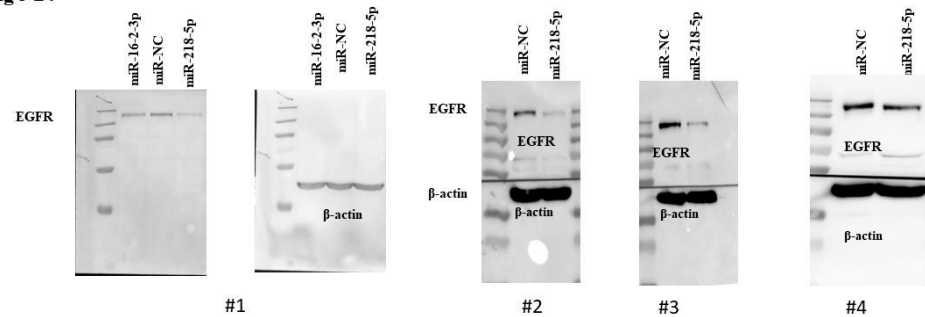

**As-T**

Fig 3 D.

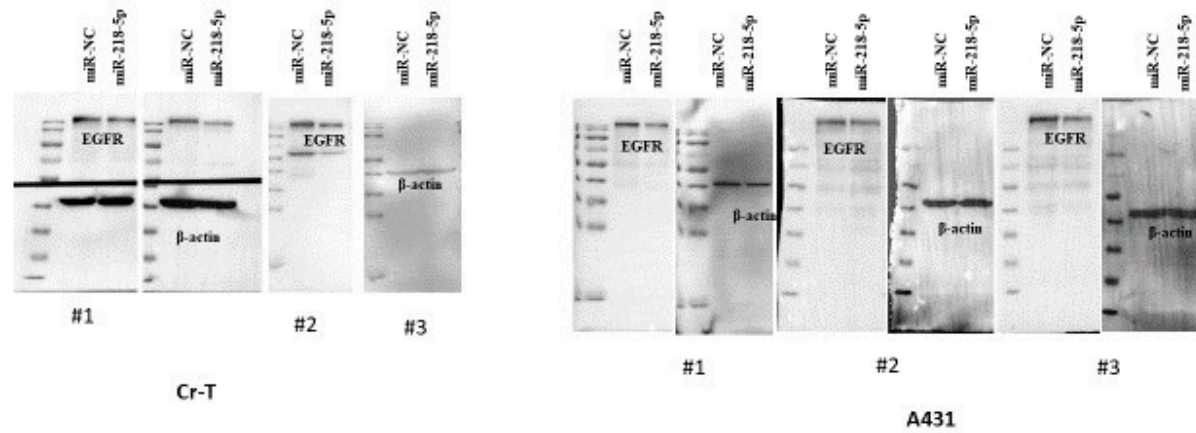

Figure 3D. Quantification: The intensity of EGFR/β-actin band in As-T, Cr-T, and A431 cells using an immunoblotting assay

|   | As-T    |            | Cr-T     |            | A431     |            |
|---|---------|------------|----------|------------|----------|------------|
|   | miR-NC  | miR-218-5p | miR-NC   | miR-218-5p | miR-NC   | miR-218-5p |
| 1 | 1.58014 | 0.419865   | 0.884018 | 0.43351    | 1.127782 | 0.790391   |
| 2 | 1.80631 | 0.193689   | 0.967345 | 0.310388   | 0.981732 | 0.718768   |
| 3 | 1.47298 | 0.527017   | 1.148637 | 0.626529   | 0.95486  | 0.436682   |
| 4 | 1.46893 | 0.531072   |          |            |          |            |

**Figure S8. The original western blots of Figure 4.**

Figure 4A. The expression of miR-218-5p in miR-218-5p stable cell lines confirmed by TaqMan real-time PCR.

| No | miR-NC   | miR-218-5p |
|----|----------|------------|
| 1  | 0.95084  | 1238.63    |
| 2  | 1.03327  | 1144.25    |
| 3  | 1.00323  | 1289.74    |
| 4  | 1.014566 | 1172.8     |

Figure 4B. Tumor size was measured twice per week when xenografts were visible

| Days  | miR-NC  |        |         |         |        |         |        |         |         |        | miR-218-5p |        |      |        |        |        |        |      |        |        |
|-------|---------|--------|---------|---------|--------|---------|--------|---------|---------|--------|------------|--------|------|--------|--------|--------|--------|------|--------|--------|
| 8     | 0.00    | 0.00   | 8.79    | 6.29    | 33.44  | 0.00    | 16.40  | 0.00    | 0.00    | 8.79   | 1.50       | 0.00   | 0.00 | 12.19  | 0.00   | 0.00   | 0.00   | 0.00 | 2.45   | 0.00   |
| 11    | 33.69   | 261.12 | 181.66  | 233.47  | 4.67   | 27.56   | 18.25  | 48.23   | 45.94   | 463.96 | 0.00       | 0.00   | 0.00 | 15.00  | 0.00   | 19.46  | 0.00   | 0.00 | 3.24   | 11.26  |
| 14    | 175.14  | 164.63 | 932.22  | 815.89  | 106.59 | 31.97   | 427.00 | 167.17  | 776.04  | 447.18 | 0.00       | 0.00   | 0.00 | 68.80  | 63.89  | 55.81  | 15.75  | 0.00 | 10.98  | 30.26  |
| 17.00 | 569.53  | 285.01 | 1667.19 | 1493.89 | 165.19 | 86.62   | 950.95 | 1250.16 | 589.36  | 478.22 | 0.00       | 0.00   | 0.00 | 262.15 | 128.44 | 144.87 | 93.31  | 0.00 | 15.75  | 83.96  |
| 21.00 | 1054.41 | 944.07 | 2678.07 | 3015.07 | 362.91 | 2491.54 | 451.00 | 1740.78 | 1374.99 | 805.00 | 0.00       | 224.32 | 0.00 | 614.13 | 233.29 | 436.39 | 118.62 | 0.00 | 104.28 | 244.36 |

Figure 4C. The image showed representative tumors collected from each group

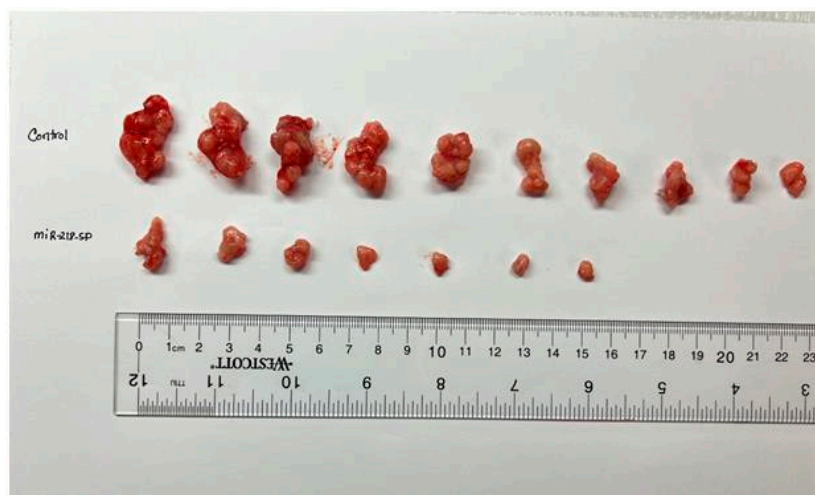

Figure 4D. Tumor weight (g) of xenografts from miR-NC and miR-218-5p groups

| Tumors No. | miR-NC | miR-218-5p |
|------------|--------|------------|
| 1          | 0.36   | 0.09       |
| 2          | 1.74   | 0          |
| 3          | 1.8    | 0.36       |
| 4          | 1.6    | 0.22       |
| 5          | 0.22   | 0.21       |
| 6          | 0.53   | 0.1        |
| 7          | 0.95   | 0          |
| 8          | 1.17   | 0.07       |
| 9          | 0.64   | 0.11       |
| 10         | 0.54   | 0          |



Figure 4E. The expression level of miR-218-5p/U6 in xenografts using TaqMan real-time PCR assay

| No. | miR-NC  | miR-218-5p |
|-----|---------|------------|
| 1   | 0.99782 | 15.062048  |
| 2   | 0.98272 | 15.807933  |
| 3   | 1.01546 | 15.083351  |
| 4   | 1.00428 | 15.136168  |
| 5   | 0.95606 | 3.7783799  |
| 6   | 1.01314 | 3.9941218  |
| 7   | 1.01987 | 3.802338   |
| 8   | 1.01228 | 3.8551988  |
| 9   | 0.97378 | 2.8413763  |
| 10  | 1.02721 | 2.8004685  |
| 11  | 1.0093  | 2.908962   |
| 12  | 0.99052 | 2.9271403  |

The expression level of KDR/  $\beta$ -actin in xenografts using real-time PCR assay

| No. | miR-NC   | miR-218-5p |
|-----|----------|------------|
| 1   | 1.286116 | 0.334264   |
| 2   | 0.765359 | 0.238138   |
| 3   | 1.015909 | 0.38       |

The expression level of FLT4/  $\beta$ -actin in xenografts using real-time PCR assay

| No. | miR-NC | miR-218-5p |
|-----|--------|------------|
|-----|--------|------------|

|   |          |          |
|---|----------|----------|
| 1 | 0.365263 | 0.16544  |
| 2 | 3.319248 | 0.081518 |
| 3 | 0.355716 | 0.222806 |
| 4 | 2.318731 | 0.288698 |
| 5 | 0.839968 | 0.214954 |
| 6 | 1.190522 | 0.183294 |

The expression level of FLT1/  $\beta$ -actin in xenografts using real-time PCR assay

| No. | miR-NC   | miR-218-5p |
|-----|----------|------------|
| 1   | 2.002295 | 0.05129    |
| 2   | 0.516729 | 0.135622   |
| 3   | 1.082032 | 0.088556   |
| 4   | 0.893241 | 0.087081   |

Figure 4F. EGFR and  $\beta$ -actin expression in tumor tissues from miR-NC and miR-218-5p groups

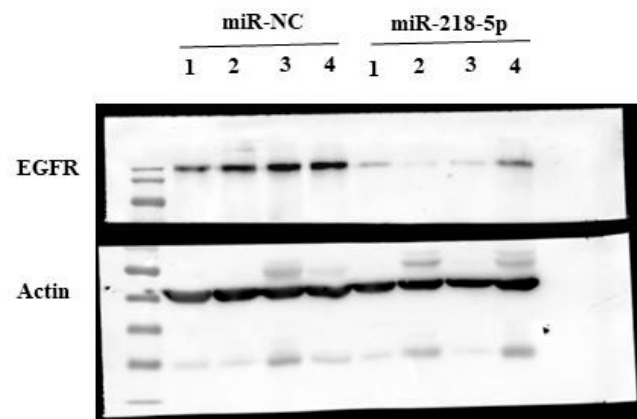

Figure 4F. quantification: the intensity of EGFR/ $\beta$ -actin expression in tumor tissues from miR-NC and miR-218-5p groups

| No. | miR-NC  | miR-218-5p |
|-----|---------|------------|
| 1   | 0.69787 | 0.1183     |
| 2   | 0.7483  | 0.025      |
| 3   | 1.405   | 0.0509     |
| 4   | 1.148   | 0.3201     |

Figure 4G. CD31 positive microvessels by immunohistochemical staining assay

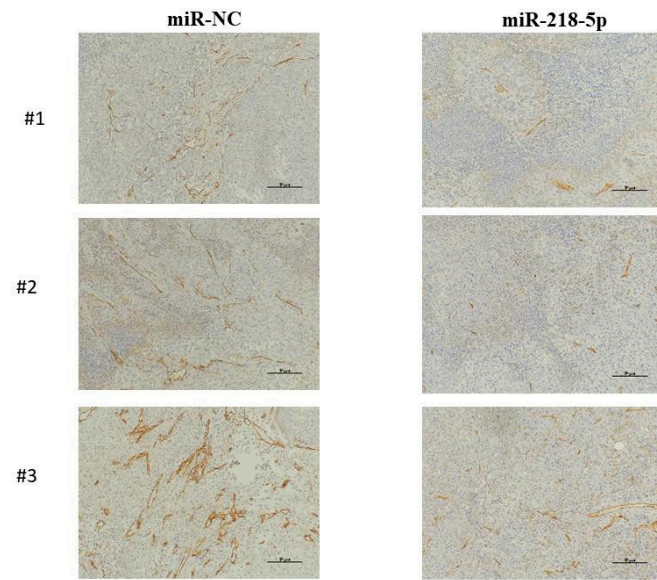

Figure 4G. Quantification: CD31 positive micro vessels by immunohistochemical staining assay

| No | miR-NC | miR-218-5p |
|----|--------|------------|
| 1  | 100    | 20         |
| 2  | 71     | 22         |
| 3  | 128    | 60         |

Figure 5A. The expression of EGFR and  $\beta$ -actin was analyzed 72 h after transfection using immunoblotting assay.

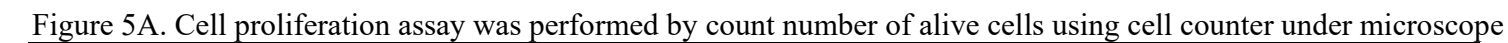

| Days | miR-NC+ Vector |       |       |        | miR-218-5p+ Vector |       |       |       | miR-218-5p+EGFR |       |       |       |
|------|----------------|-------|-------|--------|--------------------|-------|-------|-------|-----------------|-------|-------|-------|
| 0    | 10000          | 10000 | 10000 | 10000  | 10000              | 10000 | 10000 | 10000 | 10000           | 10000 | 10000 | 10000 |
| 1    | 13000          | 15500 | 14200 | 12500  | 11000              | 12600 | 11000 | 14000 | 12900           | 17000 | 15800 | 14000 |
| 2    | 18000          | 17900 | 22000 | 17500  | 17000              | 15900 | 14500 | 18000 | 19200           | 17800 | 20500 | 18500 |
| 3    | 37000          | 35600 | 32000 | 34000  | 28000              | 23500 | 24500 | 24400 | 29000           | 31000 | 32600 | 39000 |
| 4    | 44400          | 43300 | 46000 | 57000  | 37000              | 33000 | 32900 | 36000 | 52000           | 42000 | 41600 | 46000 |
| 5    | 81000          | 89000 | 96000 | 100000 | 50000              | 49000 | 53000 | 60000 | 93000           | 82000 | 89000 | 85000 |

Figure 5B. Colony formation assay using soft agar

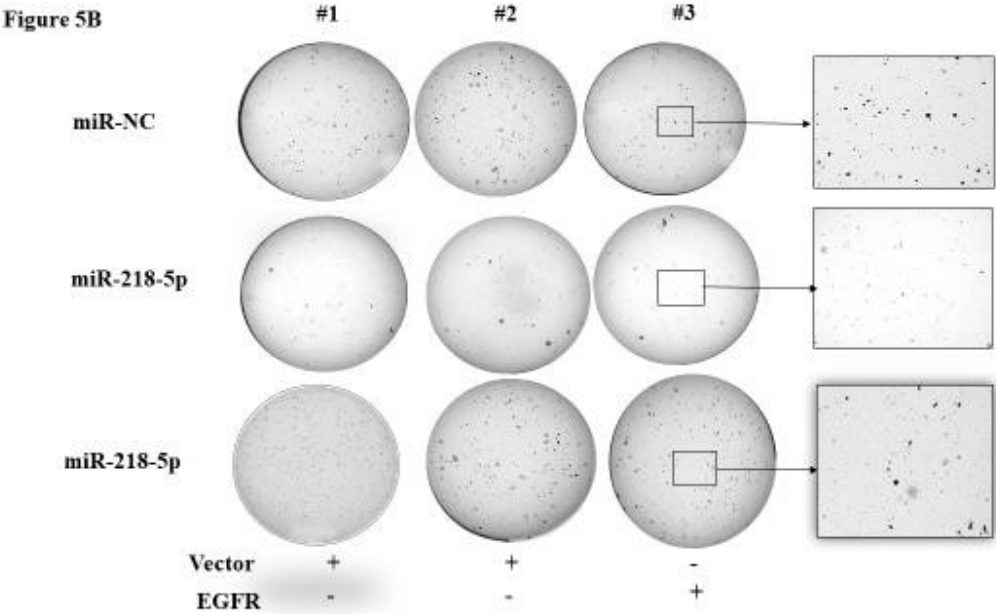

Figure 5B. Quantification: Number of colony in different treatments groups agar

| miR-NC | miR218-5P | miR218-5P |
|--------|-----------|-----------|
| 119    | 27        | 101       |
| 114    | 39        | 120       |
| 98     | 55        | 105       |

Figure 5C. Trans well migration assay

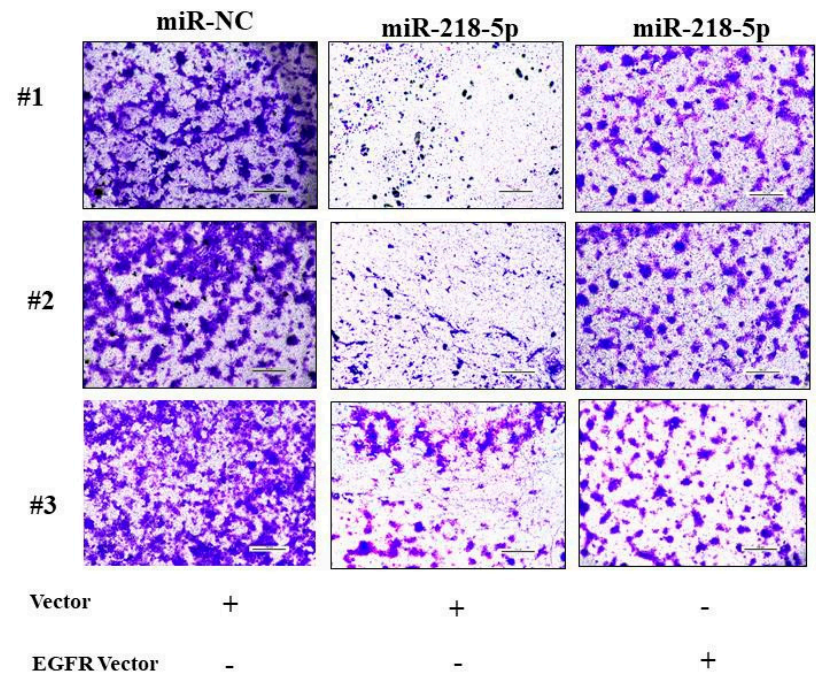

Figure 5C. Quantification: Percentage of cells migrates compare to control

| miR-NC   | miR-218-5p | miR-218-5p |
|----------|------------|------------|
| 89.69521 | 34.83309   | 74.89115   |
| 93.61393 | 30.91437   | 81.42235   |
| 116.6909 | 49.63716   | 77.50363   |

Figure 5D. Wound healing assay

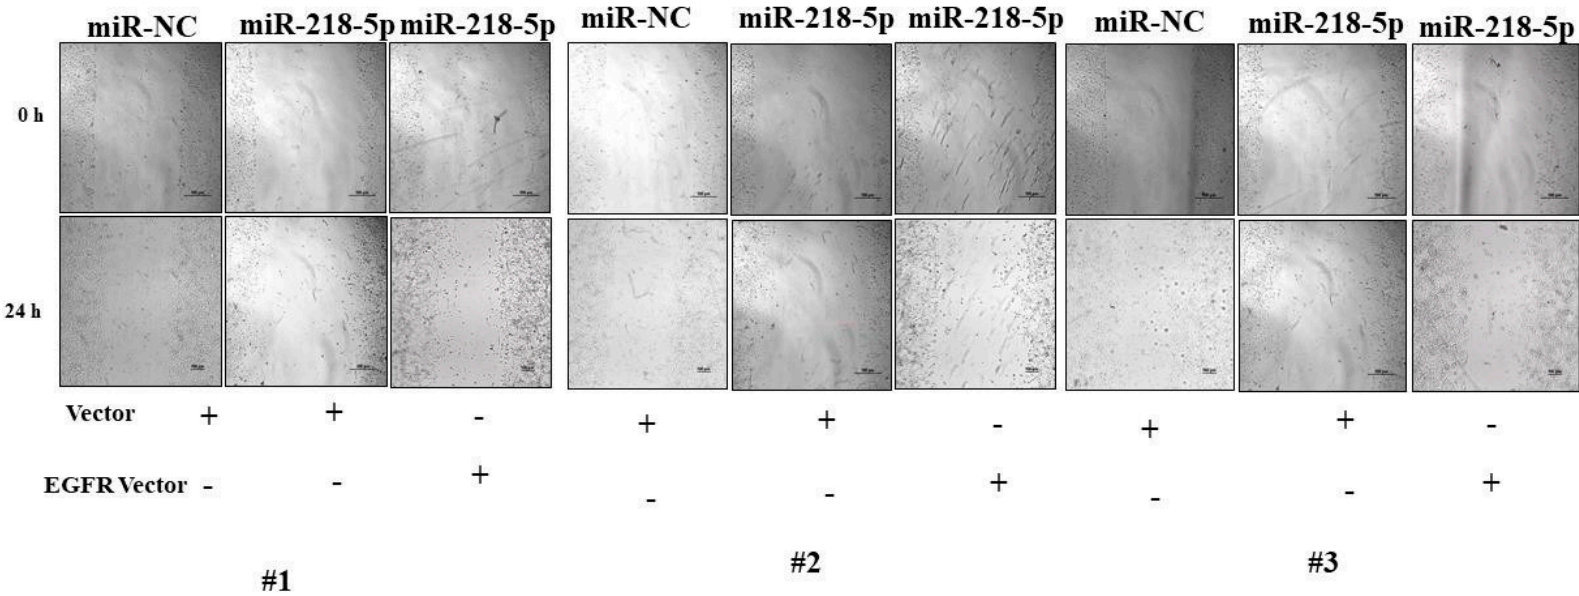

Figure 5D. Quantification: percentage of wound healing

| No. | miR-NC   | miR-218-5p | miR-218-5P |
|-----|----------|------------|------------|
| 1   | 43.21502 | 6.669697   | 31.75959   |
| 2   | 27.89    | 16.50543   | 49.27507   |
| 3   | 31.82    | 0.251334   | 49.99505   |



Figure 5E. Tube formation assay

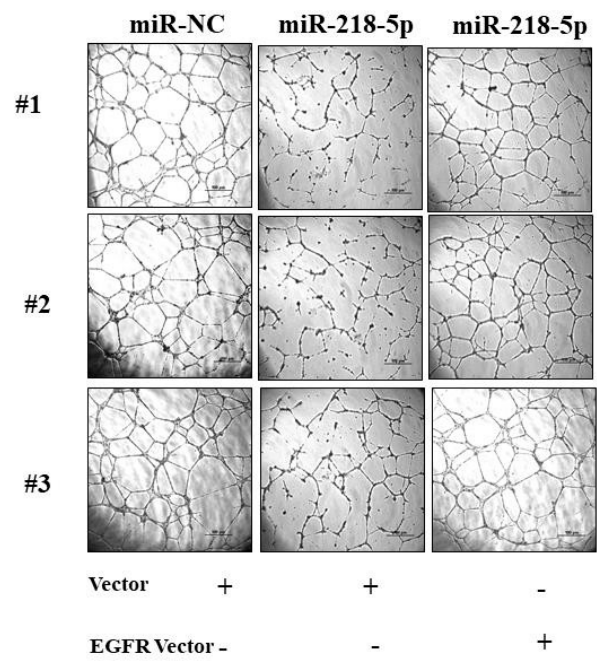

Figure 5E. Quantification: Number of meshes

| No | miR-NC | miR-218-5p | miR-218-5p |
|----|--------|------------|------------|
| 1  | 39     | 12         | 37         |
| 2  | 30     | 3          | 30         |

|   |    |   |    |
|---|----|---|----|
| 3 | 31 | 6 | 31 |
|---|----|---|----|

Vector + + -  
EGFR - - +

Figure 5E. Quantification: Total tube length

| No | miR-NC | miR-218-5p | miR-218-5p |
|----|--------|------------|------------|
| 1  | 108.06 | 59.30      | 97.31      |
| 2  | 95.21  | 37.04      | 96.19      |
| 3  | 96.72  | 52.96      | 86.56      |

Vector + + -  
EGFR - - +
